# Supplementary material for: Acellular dermal matrix hydrogels promote healing of radiation-induced skin injury in a rat model
Source: Royal Society of Chemistry journal article supplement (doi:10.1039/d4tb00941j), 2024-01-01
Supplement: d4tb00941j1.pdf [file d4tb00941j1.pdf]

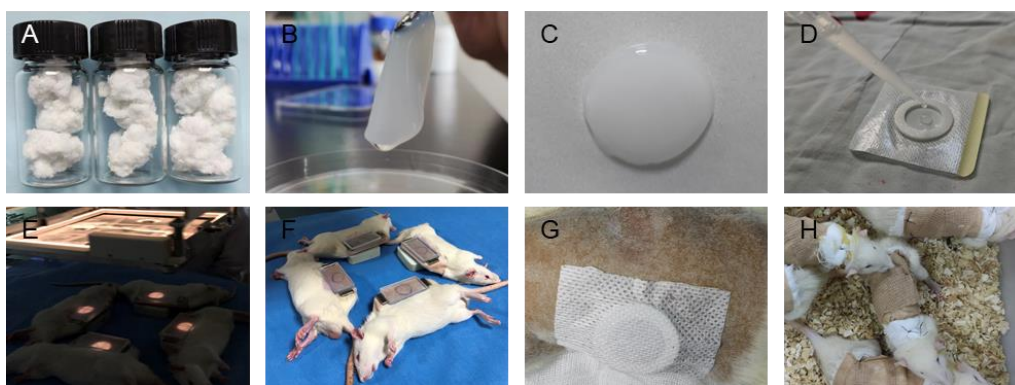

Figure 1 Preparation and application of ADM hydrogel patches in the treatment of radiation-induced skin injury

A: ADM ground into a cotton-like form, before being processed into ADM hydrogel; B: ADM Hydrogel after preparation, demonstrating sufficient mechanical strength to be lifted with forceps; C: Prepared ADM Hydrogel, retaining a circular shape; D: Uncrosslinked ADM Hydrogel being injected into the dressing, awaiting crosslinking and application to the rat skin; E-F: Rats placed on a radiotherapy machine for the induction of a radiation-induced skin injury model; four rats are positioned together for simultaneous radiation exposure; G-H: ADM hydrogel patches placed on the dorsal wounds of rats after radiation-induced skin injury.

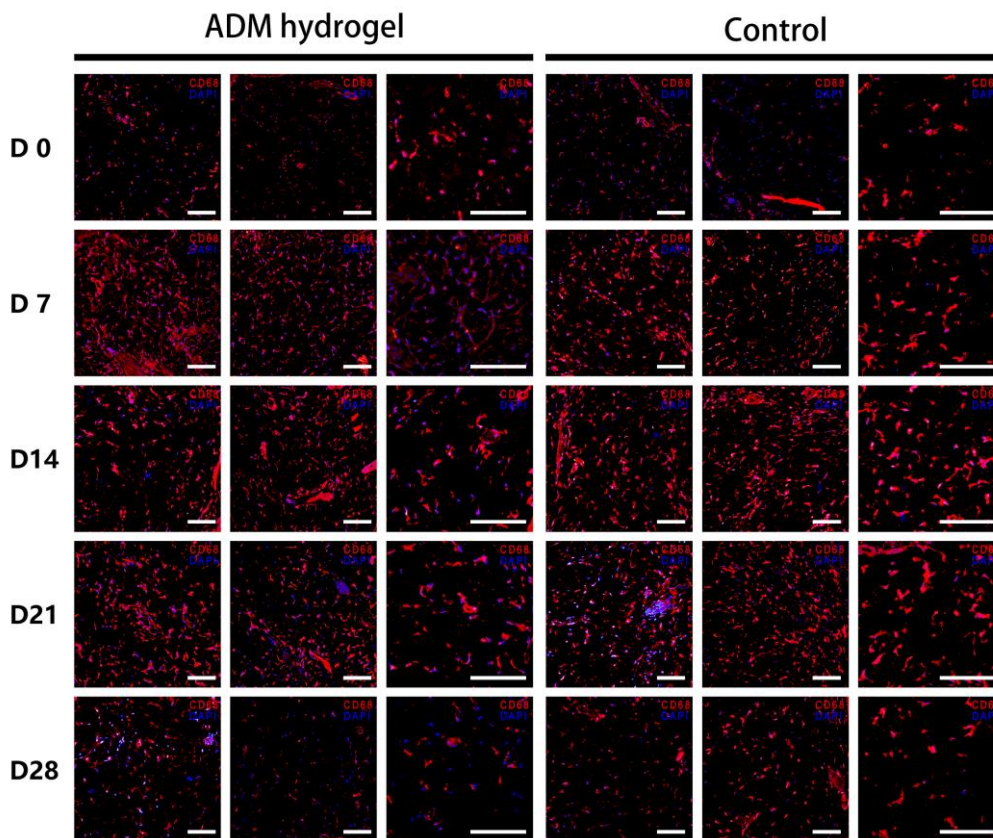

Figure 2 Representative CD68 fluorescence images. Scale bar = 50  $\mu$ m

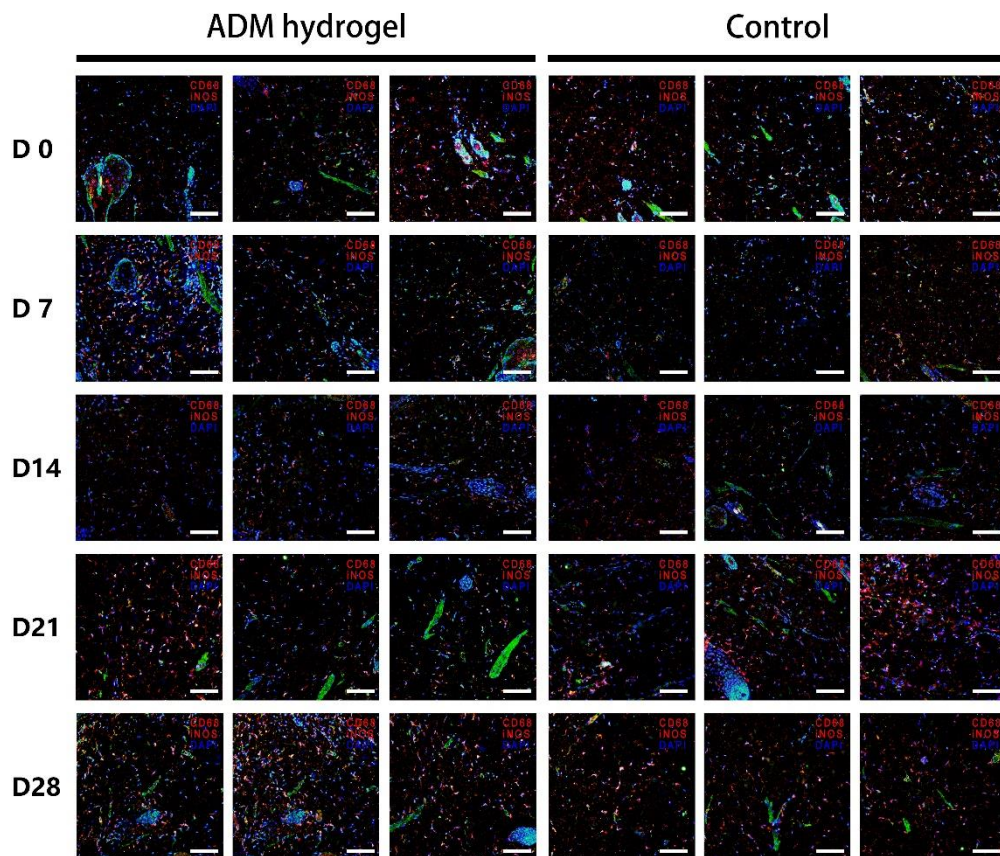

Figure 3 Representative CD68/iNOS fluorescence images. Scale bar = 50  $\mu$ m

Table 1 Douglas and Fowler Radiation-Induced Skin Injury Scoring System

| Score | Radiation-Induced Skin Injury Description                              |
|-------|------------------------------------------------------------------------|
| 1.0   | Normal skin                                                            |
| 1.5   | Mild erythema, slight dryness                                          |
| 2.0   | Moderate erythema, dryness                                             |
| 2.5   | Noticeable erythema, dry desquamation                                  |
| 3.0   | Dry desquamation, slight keratinization                                |
| 3.5   | Dry peeling, keratinization, mild epidermal damage                     |
| 4.0   | Bullous moist desquamation, moderate erythema                          |
| 4.5   | Large areas of moist peeling, exudation, extensive deep keratinization |
| 5.0   | Ulceration, full-thickness skin loss                                   |

Table 2 Automated ImageJ Script for Calculating CD68 IOD

```
// Open the dialog box to select the image to be processed
filePath = File.openDialog("Choose an Image to Process");
// Open the image
open(filePath);
```

```

// Get the title of the image (i.e. the file name)
originalTitle = getTitle();
// Check if the file name ends with "-20.png" or "-40.png"
if (endsWith(originalTitle, "-20.png")) {
    // If the file name ends with "-20.png", set the scale
    run("Set Scale...", "distance=273.6667 known=20 unit=um");
    // Remove the scale area
    setTool("rectangle");
    makeRectangle(4416, 3397, 324, 143);
    run("Cut");
} else if (endsWith(originalTitle, "-40.png")) {
    // Set the scale if the file name contains "-40.png" at the end
    run("Set Scale...", "distance=546.5 known=20 unit=um");
    // Remove the scale area
    setTool("rectangle");
    makeRectangle(4143, 3395, 598, 146);
    run("Cut");
}
// Separate channels
run("Split Channels");
// Turn off the green and blue channels of the image
selectImage(originalTitle + " (green)");
close();
selectImage(originalTitle + " (blue)");
close();
// Select the red channel
selectImage(originalTitle + " (red)");
// Apply the default threshold, you can adjust the threshold manually as needed
setAutoThreshold("Default dark");
setAutoThreshold("Yen dark");
// Take a measurement
run("Measure");
// Close the image
close();

```

Table 3 Automated ImageJ Script for Batch Processing of CD68 and iNOS Colocalization Analysis

```

// Select the folder containing all images
dir = getDirectory("Choose a Directory");
// Get all file names in the folder
list = getFileList(dir);
// Define variables to store the status of red and green channel images
red_opened = false;
green_opened = false;

```

```

// Store the current processing group number
current_group = "";
// Iterate over all files
for (i = 0; i < list.length; i++) {
    fileName = list[i];
    // Find the index of the last "-", the group number is from the start of the file name to just before the last "-"
    lastDashIndex = lastIndexOf(fileName, "-");
    // Ensure lastDashIndex is valid
    if (lastDashIndex > 0) {
        // Extract group number, it is from the start of the file name to just before the last "-"
        group = substring(fileName, 0, lastDashIndex);
    } else {
        // If the file name format is incorrect, skip this file
        continue;
    }
    // If this is a new group, reset flags
    if (group != current_group) {
        red_opened = false;
        green_opened = false;
        current_group = group;
    }
    // Determine whether the current image is for red channel (CD68) or green channel (iNOS)
    if (endsWith(fileName, "-red.tif")) {
        // Open red channel (CD68)
        open(dir + fileName);
        rename("red");
        // Convert to 8-bit image
        run("8-bit");
        // Set threshold and binarize
        setAutoThreshold("Default");
        run("Convert to Mask");
        run("Invert"); // Set positive regions to white
        // Save binary image of red channel
        run("Duplicate...", "title=red_binary");
        // Mark that red channel has been opened
        red_opened = true;
    }
    if (endsWith(fileName, "-green.tif")) {
        // Open green channel (iNOS)
        open(dir + fileName);
        rename("green");
        // Convert to 8-bit image
        run("8-bit");
        // Set threshold and binarize

```

```

setAutoThreshold("Default");
run("Convert to Mask");
run("Invert");
// Save binary image of green channel
run("Duplicate...", "title=green_binary");
// Mark that green channel has been opened
green_opened = true;
}
// When both channel images are opened, calculate colocalization area
if (red_opened && green_opened) {
// Use Image Calculator to find colocalization area (AND operation)
selectWindow("red_binary");
selectWindow("green_binary");
imageCalculator("AND create", "red_binary", "green_binary");
rename(group + "-colocalization");
// Calculate area of colocalization region
selectWindow(group + "-colocalization"); // Use new window name
run("Measure");
// Reset flags for processing next group
red_opened = false;
green_opened = false;
// Close all open images
close("*");
}
}
// Notify user when done
print("Processing complete!");

```
